# Supplementary material
Source: PubMed Central journal article supplement (PMC6121940)
Supplement: 10.1194_M085456_jlr.M085456-1.pdf [file 10.1194_M085456_jlr.M085456-1.pdf]

## Supplemental Figure S1

**A**

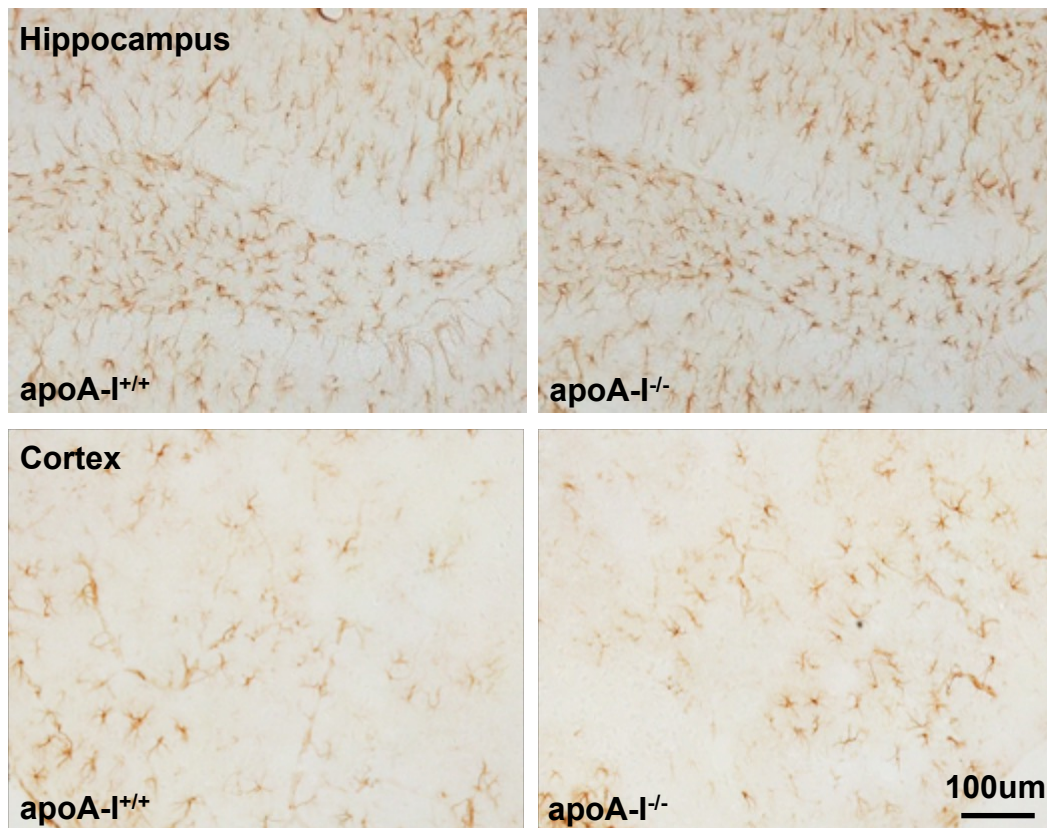

**B**

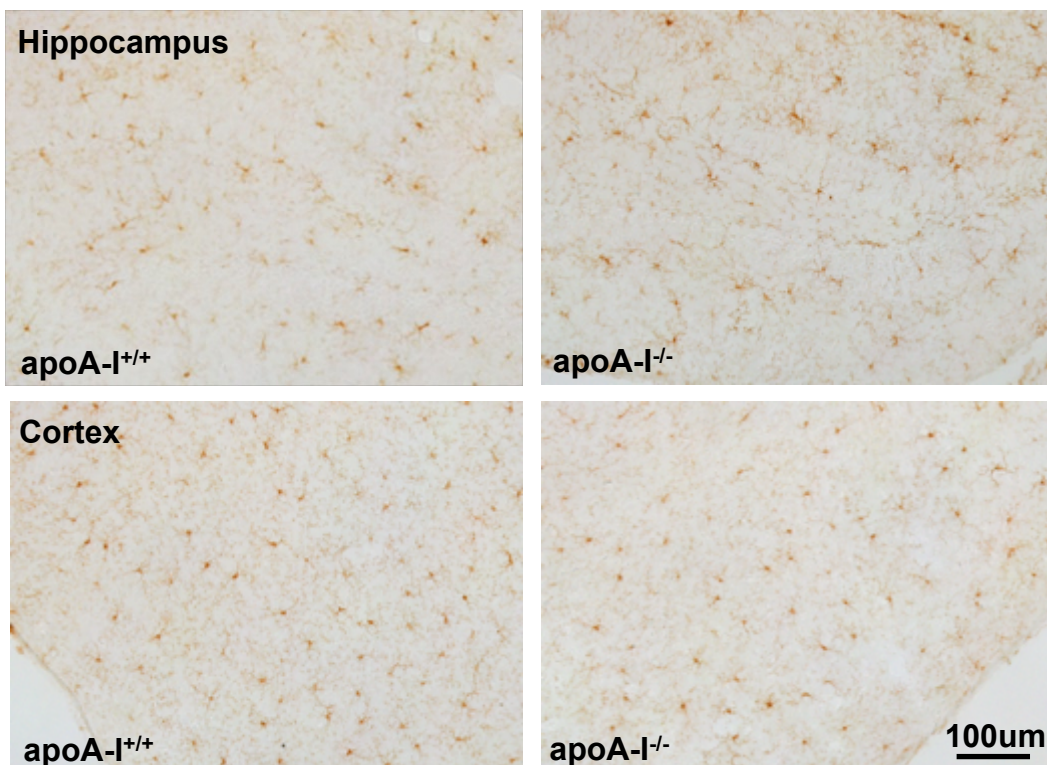

**Supplemental Figure S1: Reactive gliosis is not enhanced in the hippocampus and cortex brain area of mice with genetically reduced HDL levels.** The number of GFAP-immunopositive cells (A) and Iba-1 immunopositive cells (B) in the hippocampus and cortex are similar in *apoA-I*<sup>+/+</sup> and *apoA-I*<sup>-/-</sup> mice.

## Supplemental Figure S2

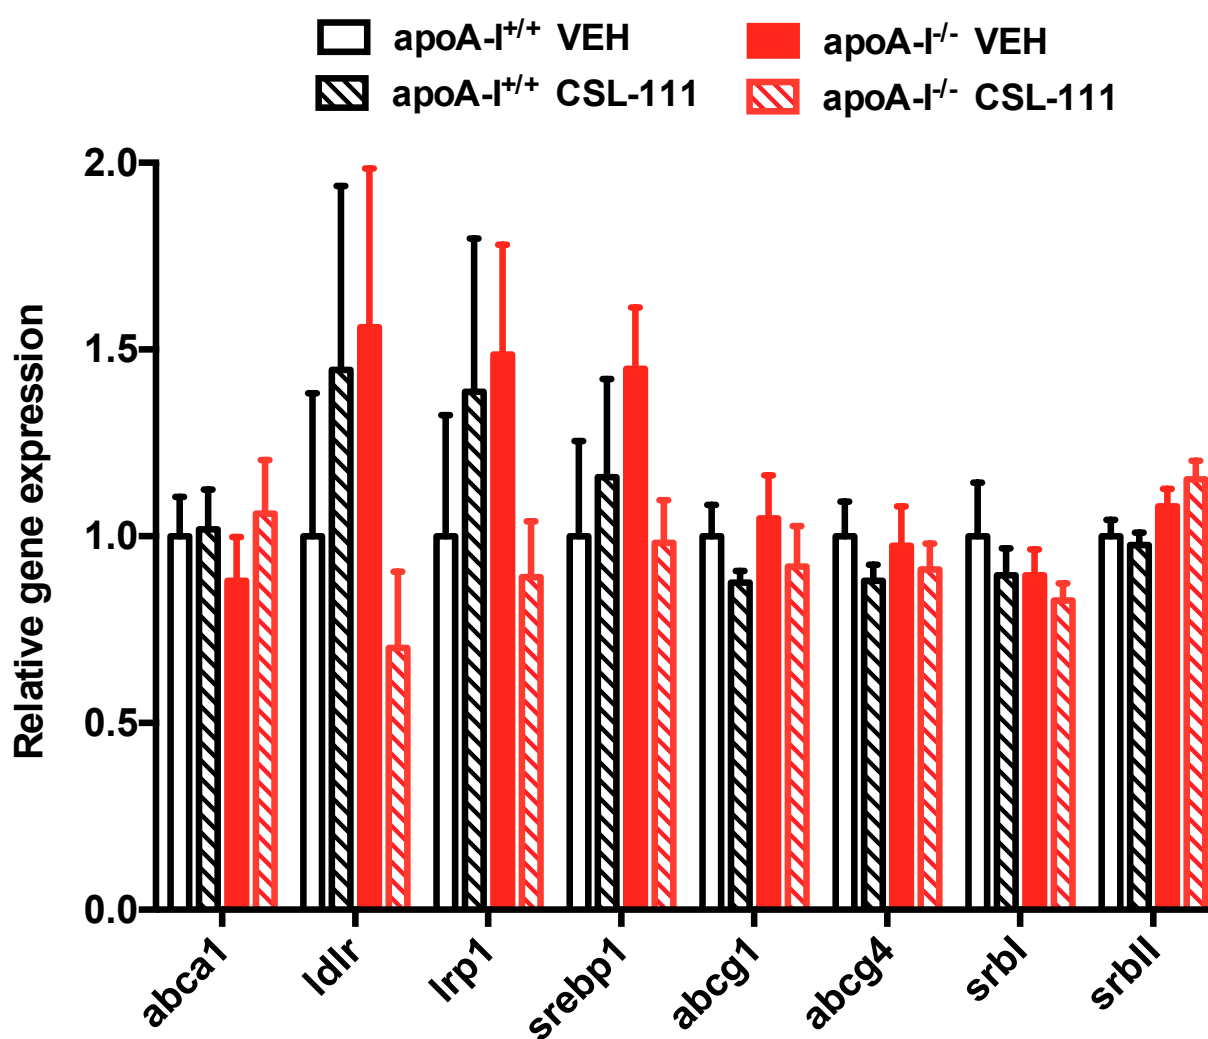

**Supplemental Figure S2:** RNA expression levels of *abca1*, *ldlr*, *lrp1*, *srebp1*, *abcg1*, *abcg4*, *srb-1* and *srb-2* in hypothalami of apoAI <sup>+/+</sup> (black bars) and apoAI<sup>-/-</sup> mice (red bars) treated with CSL-111 (hatched bars). Data are expressed as means  $\pm$  SEM. \* P<0,005 vs. apoA-I<sup>+/+</sup> mice.
